# Supplementary material for: Association of immune-related adverse events with the outcomes of immune checkpoint inhibitors in patients with dMMR/MSI-H metastatic colorectal cancer
Source: PubMed Central journal article supplement — J Immunother Cancer. 2023 Jan 2;11(1):e005493. doi: 10.1136/jitc-2022-005493 (PMC9809233; doi:10.1136/jitc-2022-005493), 2023-01-02
Supplement: jitc-2022-005493supp001.pdf [file jitc-2022-005493supp001.pdf]

**Supplemental Material 1.** Clinical management of patients requiring steroid therapy for irAEs.

| <b>Organ-specific<br/>irAE</b> | <b>Patients requiring steroid therapy<br/>(N=51)</b> |
|--------------------------------|------------------------------------------------------|
|--------------------------------|------------------------------------------------------|

*Abbreviations.* irAE(s): immune-related adverse event(s).

|                          | <b>N (%)</b> | <b>Mean prednisone-equivalent dosage (mg/day)</b> | <b>Mean treatment duration (days)</b> |
|--------------------------|--------------|---------------------------------------------------|---------------------------------------|
| <i>Gastro-intestinal</i> | 7 (13.7)     | 84.2                                              | 20                                    |
| <i>Skin</i>              | 8 (15.7)     | 82.7                                              | 62.1                                  |
| <i>Pancreatitis</i>      | 1 (1.9)      | 10                                                | 112                                   |
| <i>Pneumonitis</i>       | 1 (1.9)      | 60                                                | 28                                    |
| <i>Neurological</i>      | 0            | //                                                | //                                    |
| <i>Arthralgia</i>        | 6 (11.8)     | 35.8                                              | 185.3                                 |
| <i>Liver</i>             | 7 (13.8)     | 83.0                                              | 42.4                                  |
| <i>Renal</i>             | 0            | //                                                | //                                    |
| <i>Myositis</i>          | 1 (1.9)      | 80                                                | 97                                    |
| <i>Thyroiditis</i>       | 12 (23.5)    | 46.7                                              | 78.8                                  |
| <i>Hypophysitis</i>      | 6 (11.8)     | 60.8                                              | 47.7                                  |
| <i>Other</i>             | 2 (3.9)      | 55                                                | 28                                    |
