# Supplementary material for: Association of immune-related adverse events with the outcomes of immune checkpoint inhibitors in patients with dMMR/MSI-H metastatic colorectal cancer
Source: PubMed Central journal article supplement — J Immunother Cancer. 2023 Jan 2;11(1):e005493. doi: 10.1136/jitc-2022-005493 (PMC9809233; doi:10.1136/jitc-2022-005493), 2023-01-02

**Supplemental Material 2.** Association of different irAE(s) management (i.e. either supportive therapy alone or steroid therapy or immune-checkpoint inhibitors (ICI) discontinuation) and outcomes in terms of progression-free survival (Panel A) and overall survival (Panel B).

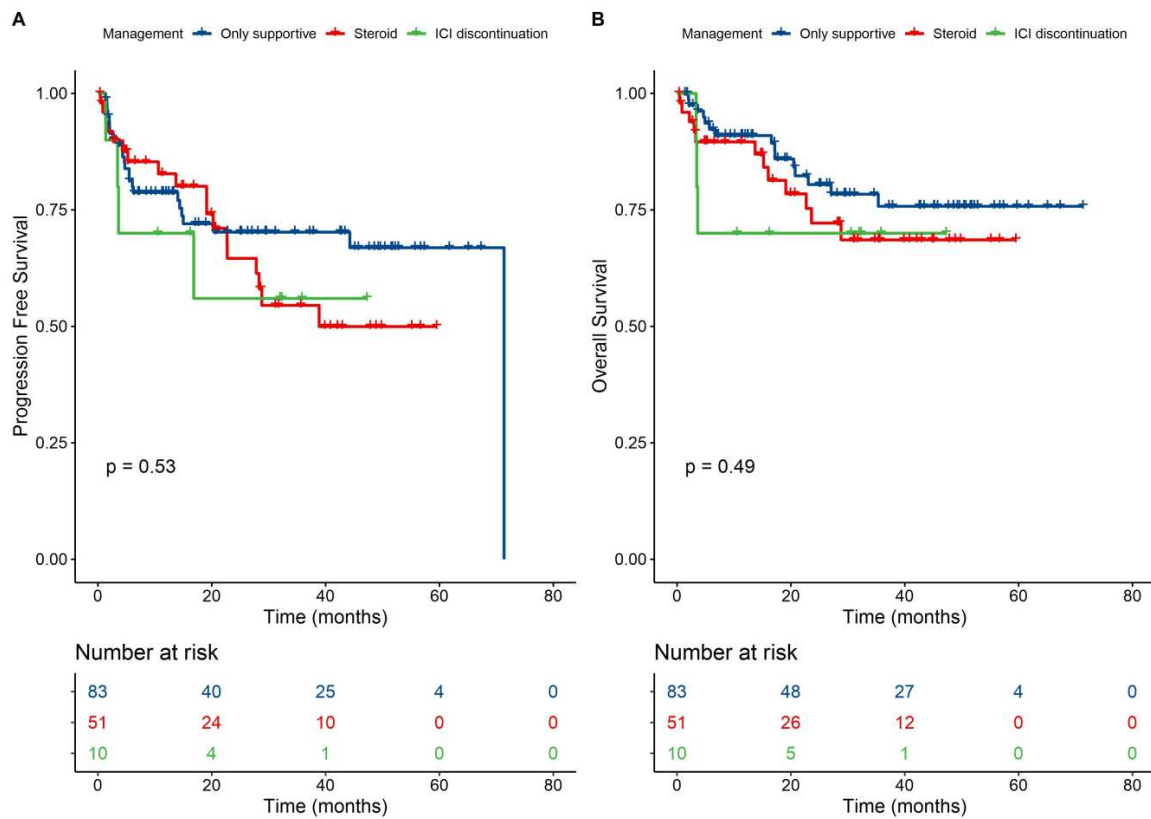

Supplement: jitc-2022-005493supp002.pdf [file jitc-2022-005493supp002.pdf]
